# Supplementary material for: A julolidine-fused anthracene derivative: synthesis, photophysical properties, and oxidative dimerization
Source: Royal Society of Chemistry journal article supplement (doi:10.1039/c8ra02205d), 2018-01-01
Supplement: c8ra02205d1.pdf [file c8ra02205d1.pdf]

## Supporting Information

### **A Julolidine-Fused Anthracene Derivative: Synthesis, Photophysical Properties, and Oxidative Dimerization**

Zeming Xia, Xiaoyu Guo, Yanpeng Zhu, Yonggen Wang, Jiaobing Wang\*

School of Chemistry, Sun Yat-Sen University, Guangzhou 510275, People's Republic of China.

e-mail: wangjb5@mail.sysu.edu.cn

#### **General remarks**

Chemicals were purchased from Energy Chemical, Aldrich, J&K Chemical, and were used without further purification. Freshly distilled tetrahydrofuran (THF), dichloromethane (DCM) were used for synthesis. Compound **1** was synthesized according to a reported procedure,<sup>1a</sup> and the synthesis of compound **4** is based on another literature<sup>1b</sup>. Qingdao Haiyang silica gel (200-300 mesh) was used in flash chromatography. Technical grade solvents were used for extraction and chromatography. NMR spectra were recorded on a Bruker Avance 300 spectrometer (300 MHz). UV-vis absorbance spectra were recorded on a Shimadzu UV-2600 spectrophotometer. The emission spectra in solution were recorded on a Shimadzu RF-5301PC spectrophotometer. Cyclic voltammetry experiments were carried out at room temperature in argon-purged solutions with CHI660E electrochemical workstation. High-resolution mass spectra were recorded with a Bruker ESI-Q-TOF MaXis 4G mass spectrometer. The single crystal X-ray diffraction data was collected on an Agilent Sapphire3 Gemini Ultra single crystal diffractometer using CuK $\alpha$  radiation.

#### **Contents:**

|                                                         |     |
|---------------------------------------------------------|-----|
| Synthesis.....                                          | S2  |
| Photophysical properties.....                           | S4  |
| DFT calculations.....                                   | S5  |
| Cyclic voltammetry.....                                 | S7  |
| X-ray crystallographic analysis.....                    | S8  |
| <sup>1</sup> H-NMR and <sup>13</sup> C-NMR spectra..... | S10 |

## Synthesis

**Scheme S1.** Synthesis of **J-A**

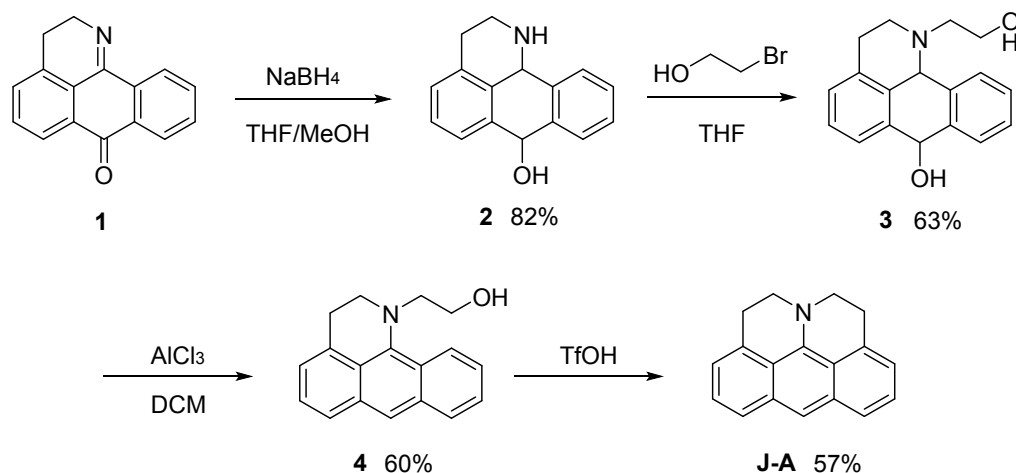

**Compound 2:** NaBH<sub>4</sub> (8.2 g, 210 mmol) was added portionwise to a solution of **compound 1** (5.0 g, 21 mmol) dissolved in a mixed solvent of MeOH (100 mL) and THF (100 mL) under 0 °C. The solution was stirred at 0 °C for 10 min and quenched with H<sub>2</sub>O. The reaction mixture was extracted with DCM (50 mL × 3), and the organic phase was dried over anhydrous Na<sub>2</sub>SO<sub>4</sub> and concentrated under reduced pressure. The residue was purified via silica gel column chromatography with EA/MeOH = 20/1 (V/V) as an eluent, providing **compound 2** as a white solid (4.1 g, yield 82 %). <sup>1</sup>H NMR (300 MHz, MeOD) δ 7.77 (dd, *J* = 5.2, 2.9 Hz, 1H), 7.58 (t, *J* = 7.0 Hz, 2H), 7.41 – 7.27 (m, 2H), 7.23 (t, *J* = 7.6 Hz, 1H), 7.05 (d, *J* = 7.5 Hz, 1H), 5.48 – 5.33 (m, 1H), 4.62 (s, 1H), 3.56 – 3.41 (m, 1H), 3.21 (td, *J* = 12.0, 3.8 Hz, 1H), 3.03 (ddd, *J* = 19.2, 15.2, 6.5 Hz, 1H), 2.81 (d, *J* = 16.8 Hz, 1H). <sup>13</sup>C NMR (75 MHz, MeOD) δ 139.87, 139.39, 136.30, 133.10, 132.20, 126.85, 126.17, 126.09, 125.89, 122.45, 122.16, 120.33, 67.25, 53.35, 42.68, 28.12. HRMS (ESI): calcd. for C<sub>16</sub>H<sub>15</sub>NO [M+H]<sup>+</sup>: 238.122<sub>6</sub>, found: 238.122<sub>3</sub>.

**Compound 3:** **Compound 2** (2.0 g, 8.4 mmol), K<sub>2</sub>CO<sub>3</sub> (5.8 g, 42 mmol) and 2-Bromoethanol (5.3 mg, 42 mmol) were suspended in THF (100 mL). The solution was stirred at 70 °C under N<sub>2</sub> for 12 h. After cooling to room temperature, the reaction mixture was washed with water and extracted with DCM (50 mL × 3), the organic phase was dried over Na<sub>2</sub>SO<sub>4</sub> and evaporated under reduced pressure. The residue was purified by silica gel column chromatography with DCM as an eluent to provide **compound 3** as a pale yellow oil (1.5 g, yield 63 %). <sup>1</sup>H NMR (300 MHz, MeOD) δ 7.78 (dd, *J* = 5.0, 3.7 Hz, 1H), 7.69 (dd, *J* = 4.6, 3.7 Hz, 1H), 7.51 (d, *J* = 7.6 Hz, 1H), 7.32 – 7.21 (m, 2H), 7.17 (t, *J* = 7.6 Hz, 1H), 7.00 (d, *J* = 7.5 Hz, 1H), 5.44 (s, 1H), 4.22 (s, 1H), 3.89 (ddd, *J* = 17.2, 11.3, 5.1 Hz, 2H), 3.36 – 3.30 (m, 1H), 3.26 – 3.08 (m, 1H), 2.86 (d, *J* = 6.5 Hz, 3H), 2.65 (dt, *J* = 12.9, 5.8 Hz, 1H). <sup>13</sup>C NMR (75 MHz, MeOD) δ 141.06, 140.68, 137.50, 133.11, 132.40, 125.91, 125.73, 125.49, 125.26, 123.29, 122.11, 120.04, 67.77, 60.71, 59.55, 26.11. HRMS (ESI): calcd. for C<sub>18</sub>H<sub>19</sub>NO<sub>2</sub> [M+H]<sup>+</sup>: 282.148<sub>8</sub>, found: 282.148<sub>0</sub>.

**Compound 4:** AlCl<sub>3</sub> (2.4 g, 18 mmol) was added portionwise to a solution of **Compound 3** (1.0 g, 3.6 mmol) dissolved in dry DCM (50 mL) under 0 °C. The solution was stirred at 25 °C for 30 min and quenched with H<sub>2</sub>O. The reaction mixture was extracted with DCM (50 mL × 3), and the organic phase was dried over anhydrous Na<sub>2</sub>SO<sub>4</sub> and concentrated under reduced pressure. The residue was purified via silica gel column chromatography with DCM/PE = 1/1 (V/V) as an eluent, providing **compound 4** as a yellow solid (0.7 g, yield 60 %). <sup>1</sup>H NMR (300 MHz, CDCl<sub>3</sub>) δ 8.65 – 8.52 (m, 1H), 8.17 (s, 1H), 8.05 – 7.94 (m, 1H), 7.87 (d, *J* = 8.5 Hz, 1H), 7.58 – 7.44 (m, 2H), 7.40 (dd, *J* = 8.5, 6.7 Hz, 1H), 7.18 (dd, *J* = 6.6, 1.0 Hz, 1H), 4.08 (t, *J* = 5.8 Hz, 2H), 3.71 – 3.54 (m, 2H), 3.42 (t, *J* = 5.8 Hz, 2H), 3.27 – 3.14 (m, 2H). <sup>13</sup>C NMR (75 MHz, CDCl<sub>3</sub>) δ 143.04, 132.86, 132.51, 131.63, 128.87, 126.74, 125.32, 124.85, 124.81, 124.66, 123.83, 123.24, 122.45, 121.79, 60.08, 56.03, 44.92, 24.45. HRMS (ESI): calcd. for C<sub>18</sub>H<sub>17</sub>NO [M] <sup>+</sup>: 263.130<sub>4</sub>, found: 263.1331

**Compound J-A:** **Compound 4** (0.5 g, 1.9 mmol) was dissolved in trifluoromethanesulfonic acid (10 mL) and the solution was stirred at 130 °C under N<sub>2</sub> for 12 h. After cooling to room temperature, the reaction mixture was poured into ice water and neutralized with NH<sub>3</sub>·H<sub>2</sub>O (20 mL). The mixture was extracted with DCM (50 mL × 3), and the organic phase was dried over anhydrous Na<sub>2</sub>SO<sub>4</sub> and concentrated under reduced pressure. The residue was purified via silica gel column chromatography with DCM/PE = 1/3 (V/V) as an eluent, providing **compound J-A** as a yellow solid (0.3 g, yield 57 %). <sup>1</sup>H NMR (300 MHz, CDCl<sub>3</sub>) δ 7.73 (d, *J* = 8.5 Hz, 2H), 7.69 (s, 1H), 7.34 (dd, *J* = 8.6, 6.7 Hz, 2H), 7.00 (dd, *J* = 6.6, 1.1 Hz, 2H), 3.49 (dd, *J* = 8.9, 3.5 Hz, 4H), 3.43 – 3.30 (m, 4H). <sup>13</sup>C NMR (75 MHz, CDCl<sub>3</sub>) δ 141.83, 132.91, 132.37, 125.83, 125.45, 119.25, 116.19, 113.16, 50.68, 30.15. HRMS (ESI): calcd. for C<sub>18</sub>H<sub>15</sub>N [M] <sup>+</sup>: 245.119<sub>9</sub>, found: 245.1124.

**Compound 5:** <sup>1</sup>H NMR (300 MHz, CDCl<sub>3</sub>) δ 7.90 – 7.80 (m, 2H), 7.72 (ddd, *J* = 5.6, 3.1, 1.0 Hz, 2H), 7.36 – 7.20 (m, 5H), 4.11 – 3.84 (m, 2H), 3.02 (dd, *J* = 8.6, 6.8 Hz, 2H). <sup>13</sup>C NMR (75 MHz, CDCl<sub>3</sub>) δ 132.77, 132.46, 125.45, 125.21, 120.84, 119.51, 116.33, 51.04, 30.65. HRMS (ESI): calcd. for C<sub>36</sub>H<sub>28</sub>N<sub>2</sub> [M+H] <sup>+</sup>: 489.232<sub>5</sub>, found: 489.2338.

## Photophysical properties of J-A and compound 5

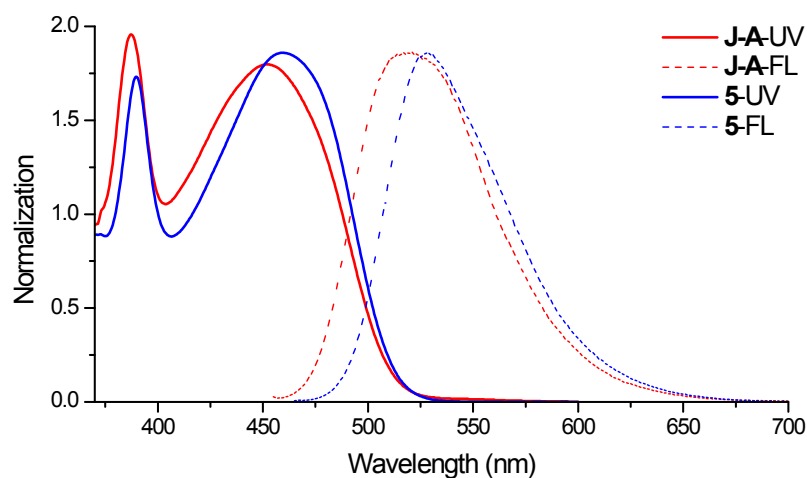

Figure S1 Absorption and emission spectra of **J-A** and **5** (Absorption spectra were recorded at the concentration of  $10^{-4}$  mol/L in dichloromethane in a 1 cm cuvette. Emission spectra were recorded at the concentration of  $10^{-5}$  mol/L in dichloromethane in a 1 cm cuvette. Excitation wavelength: 450 nm.)

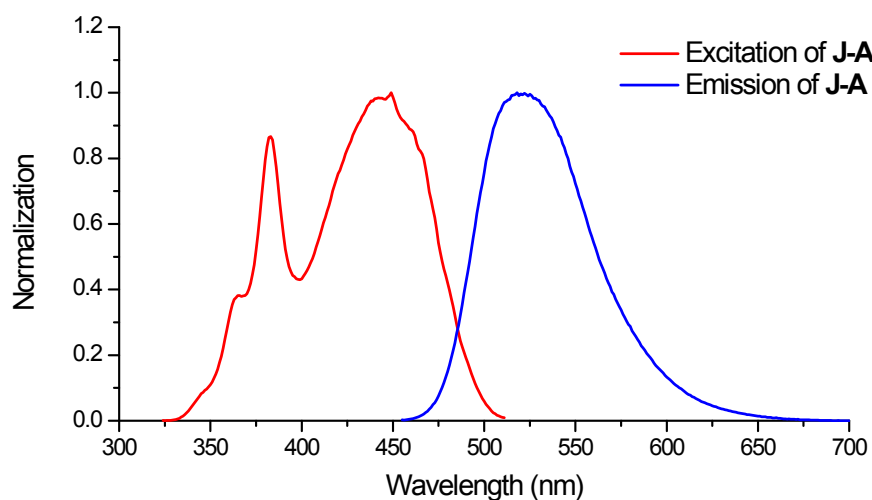

Figure S2 Excitation and emission spectra of **J-A** (the excitation and emission spectrum was recorded at the concentration of  $10^{-5}$  mol/L in dichloromethane in a 1 cm cuvette. The emission wavelength of the excitation spectrum is 520 nm and the excitation wavelength of the emission spectrum is 450 nm.)

Table S1. Quantum yield of compound **J-A**, **5**, **DAA** and **Anthracene**

| Compound                          | <b>J-A</b> | <b>5</b> | <b>DAA</b> | <b>Anthracene</b> |
|-----------------------------------|------------|----------|------------|-------------------|
| $\Phi$ Quantum yield <sup>a</sup> | 0.55       | 0.02     | 0.03       | 0.22              |

<sup>a</sup>The quantum yields of the compounds were measured in toluene. 9,10-diphenyl-anthracene **DPA** ( $\phi=0.70$  in toluene) is used as reference.<sup>2</sup>

## DFT Calculations <sup>3</sup>

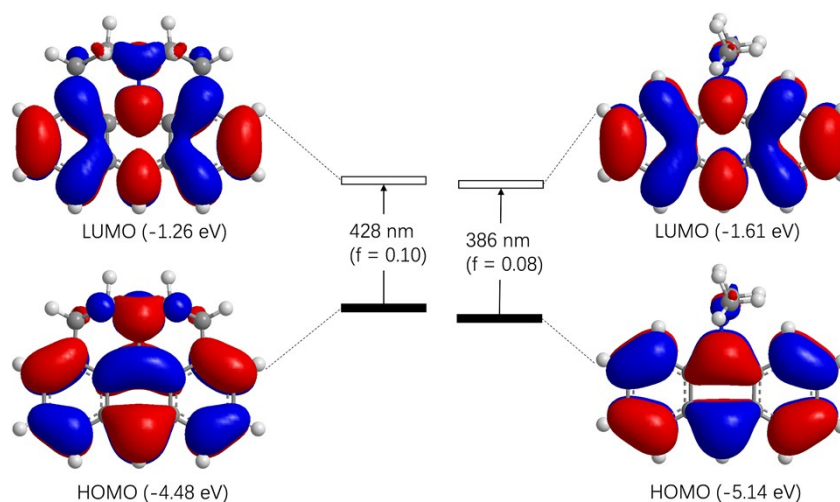

Figure S3. Kohm-Sham frontier orbitals of **J-A** and **DAA** calculated at the B3LYP/6-31G(d) level of theory (isovalue = 0.02). Orbital energies were given in parentheses. Excitation energies were computed by TD-DFT at the same level. Values in parentheses represent the oscillator strengths (f)

Table S2. Excitation energies and oscillator strengths

| Compound   | Transition                     | Wavelength (nm) | Energy (eV) | Oscillator strength |
|------------|--------------------------------|-----------------|-------------|---------------------|
| <b>J-A</b> | S <sub>0</sub> -S <sub>1</sub> | 428.44          | 2.8938      | 0.0995              |
|            | S <sub>0</sub> -S <sub>2</sub> | 337.07          | 3.6783      | 0.0546              |
|            | S <sub>0</sub> -S <sub>3</sub> | 297.42          | 4.1686      | 0.0016              |
|            | S <sub>0</sub> -S <sub>4</sub> | 277.90          | 4.4614      | 0.0018              |
|            | S <sub>0</sub> -S <sub>5</sub> | 263.37          | 4.7076      | 0.0000              |

Table S3. Coefficient of orbital

| Compound   | Transition                     | Coefficient of orbital   |                          |
|------------|--------------------------------|--------------------------|--------------------------|
| <b>J-A</b> | S <sub>0</sub> -S <sub>1</sub> | HOMO → LUMO (0.70165)    |                          |
|            | S <sub>0</sub> -S <sub>2</sub> | HOMO-1 → LUMO (-0.35588) | HOMO → LUMO+1 (0.60759)  |
|            | S <sub>0</sub> -S <sub>3</sub> | HOMO-3 → LUMO (0.17289)  | HOMO → LUMO+2 (0.67843)  |
|            | S <sub>0</sub> -S <sub>4</sub> | HOMO-2 → LUMO (0.69566)  |                          |
|            | S <sub>0</sub> -S <sub>5</sub> | HOMO-3 → LUMO (0.66983)  | HOMO → LUMO+2 (-0.16807) |

Table S4. Cartesian coordinates of optimized structure of **J-A**

|   |             |          |          |
|---|-------------|----------|----------|
| H | 4.60777871  | 0.321903 | -0.18481 |
| C | 3.6604325   | -0.20729 | -0.11117 |
| C | 2.48224431  | 0.499556 | -0.13552 |
| C | 2.47204315  | -2.3112  | 0.072689 |
| C | 1.22925688  | -0.18686 | -0.03388 |
| C | 3.6552554   | -1.6247  | -0.00085 |
| C | 1.21751825  | -1.62576 | 0.05037  |
| C | 0.00000003  | 0.526474 | -0.03592 |
| H | 4.60048257  | -2.16104 | 0.018407 |
| H | -0.0000001  | -3.39709 | 0.186273 |
| H | 2.46460875  | -3.39615 | 0.144213 |
| C | -1.229257   | -0.18686 | -0.03388 |
| C | -2.48224434 | 0.499557 | -0.13552 |
| C | -1.21751859 | -1.62576 | 0.05037  |
| H | -2.46461002 | -3.39615 | 0.144213 |
| C | -0.00000019 | -2.31253 | 0.109072 |
| C | -3.66043269 | -0.20729 | -0.11117 |
| H | -4.60777882 | 0.321904 | -0.18481 |
| C | -3.65525584 | -1.62469 | -0.00085 |
| H | -4.60048302 | -2.16104 | 0.018407 |
| C | -2.47204379 | -2.3112  | 0.072689 |
| N | 0.00000016  | 1.923249 | -0.04243 |
| C | -1.22735073 | 2.58242  | 0.3999   |
| H | -1.35457365 | 2.475488 | 1.49249  |

|   |             |          |          |
|---|-------------|----------|----------|
| H | -1.13210403 | 3.65164  | 0.18217  |
| C | 1.22735186  | 2.582421 | 0.3999   |
| H | 1.35457404  | 2.475488 | 1.49249  |
| H | 1.13210498  | 3.65164  | 0.182169 |
| C | 2.43756758  | 1.995757 | -0.32058 |
| H | 3.35680262  | 2.464781 | 0.048379 |
| H | 2.35926263  | 2.237132 | -1.39068 |
| C | -2.43756709 | 1.995758 | -0.32058 |
| H | -2.35926224 | 2.237133 | -1.39068 |
| H | -3.3568017  | 2.464782 | 0.048379 |

### Cyclic voltammetry

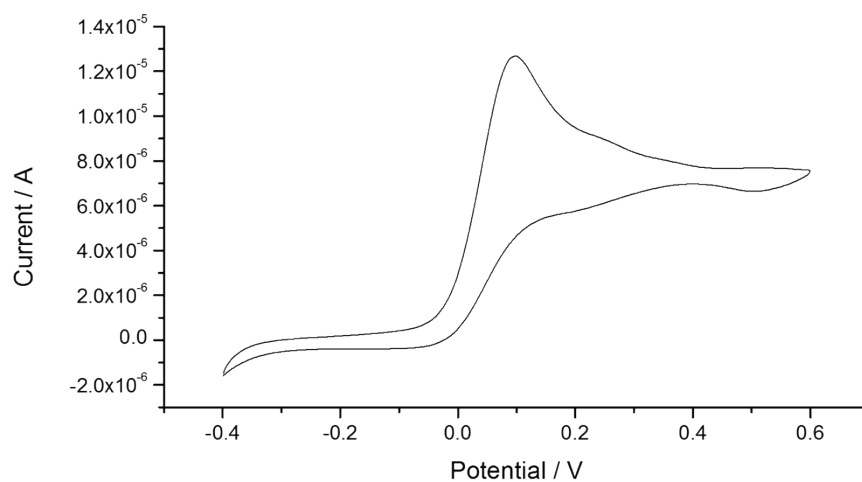

Figure S4. CV diagrams of **J-A** (vs Fc/Fc<sup>+</sup>) in dichloromethane. One irreversible oxidation wave is identified at 0.007 V. Supporting electrolyte: 0.1 M n-Bu<sub>4</sub>NPF<sub>6</sub>. Working electrode: Pt disk. Counter electrode: Pt wire. Reference electrode: Ag/Ag<sup>+</sup>. Scan rate: 10 mV/s.

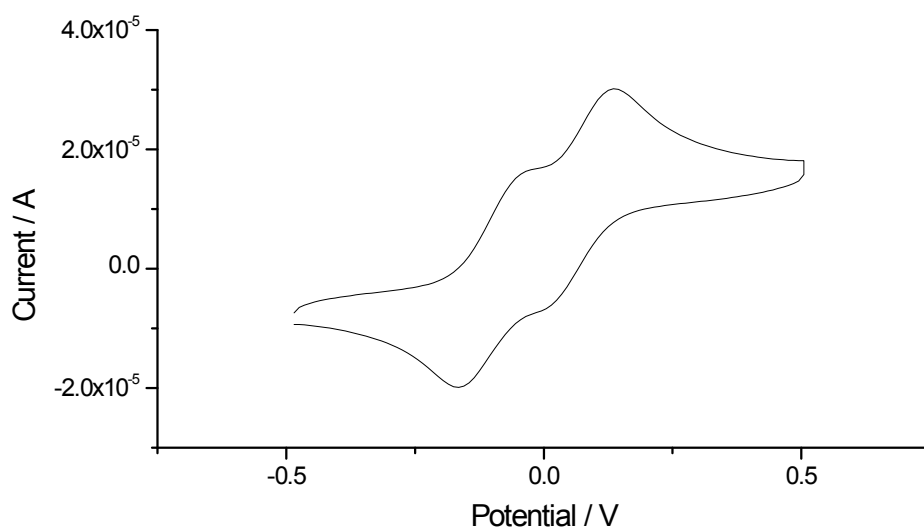

Figure S5. CV diagrams of **5** (vs Fc/Fc<sup>+</sup>) in dichloromethane. Two oxidation waves are identified at -0.010 V and 0.135 V, respectively. Supporting electrolyte: 0.1 M n-Bu<sub>4</sub>NPF<sub>6</sub>. Working electrode: Pt disk. Counter electrode: Pt wire. Reference electrode: Ag/Ag<sup>+</sup>. Scan rate: 500 mV/s.

### X-ray crystallographic analysis

Method of crystal growth: 2 mg of **J-A** was dissolved in dichloromethane (1 ml) under air atmosphere. After 12 h, yellow crystals suitable for X-ray structural determination were obtained.

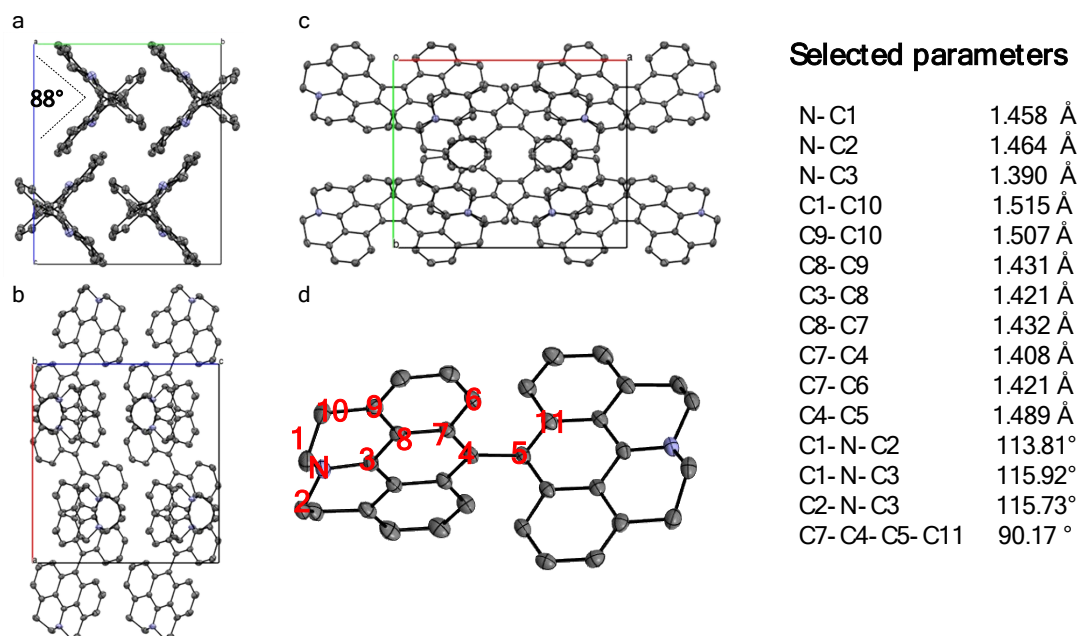

Figure S6. Packing mode of **J-A** in the crystal. View along (a) a-axis; (b) b-axis; (c) c-axis; and (d) X-ray crystal structure of **J-A**, Hydrogen atoms were omitted for clarity. Inset: Representative crystal data are shown.



Table S5. Crystallographic data and refinement details of **5**

| Compound                                                      | <b>5</b>                                       |
|---------------------------------------------------------------|------------------------------------------------|
| Formula                                                       | C <sub>36</sub> H <sub>28</sub> N <sub>2</sub> |
| MW                                                            | 488.60                                         |
| Lattice type                                                  | orthorhombic                                   |
| Space group                                                   | PBCN                                           |
| a /Å                                                          | 14.7747(3)                                     |
| b/Å                                                           | 11.8462(3)                                     |
| c/Å                                                           | 13.9054(3)                                     |
| $\alpha$ /°                                                   | 90                                             |
| $\beta$ /°                                                    | 90                                             |
| $\gamma$ /°                                                   | 90                                             |
| V/Å <sup>3</sup>                                              | 2433.78(9)                                     |
| Z value                                                       | 4                                              |
| $\rho_{\text{calc}}$ (g/cm <sup>-3</sup> )                    | 1.334                                          |
| T /K                                                          | 150                                            |
| GOF on F <sup>2</sup>                                         | 1.032                                          |
| R <sub>1</sub> [F <sup>2</sup> >2 $\sigma$ (F <sup>2</sup> )] | 0.0409( 2056)                                  |
| wR <sub>2</sub> (all data)                                    | 0.1181( 2370)                                  |
| CCDC                                                          | 1829089                                        |

## NMR Spectra

$^1\text{H}$  NMR spectrum of **2**

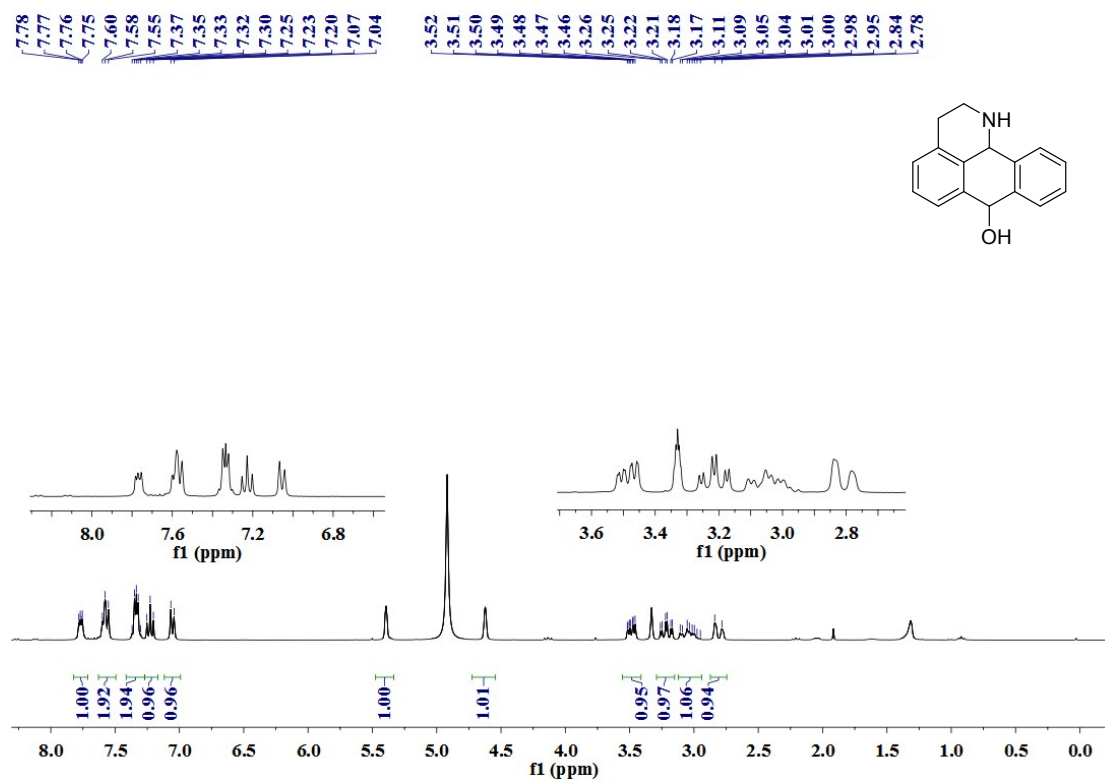

$^{13}\text{C}$  NMR spectrum of **2**

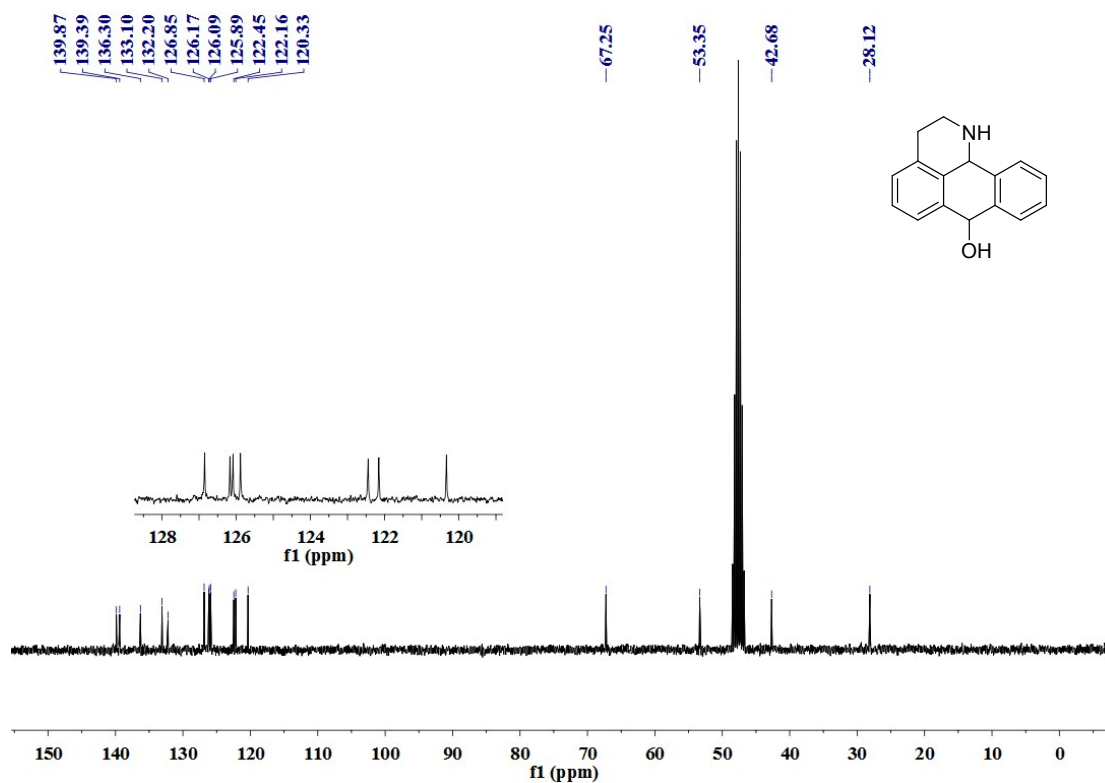

$^1\text{H}$  NMR spectrum of **3**

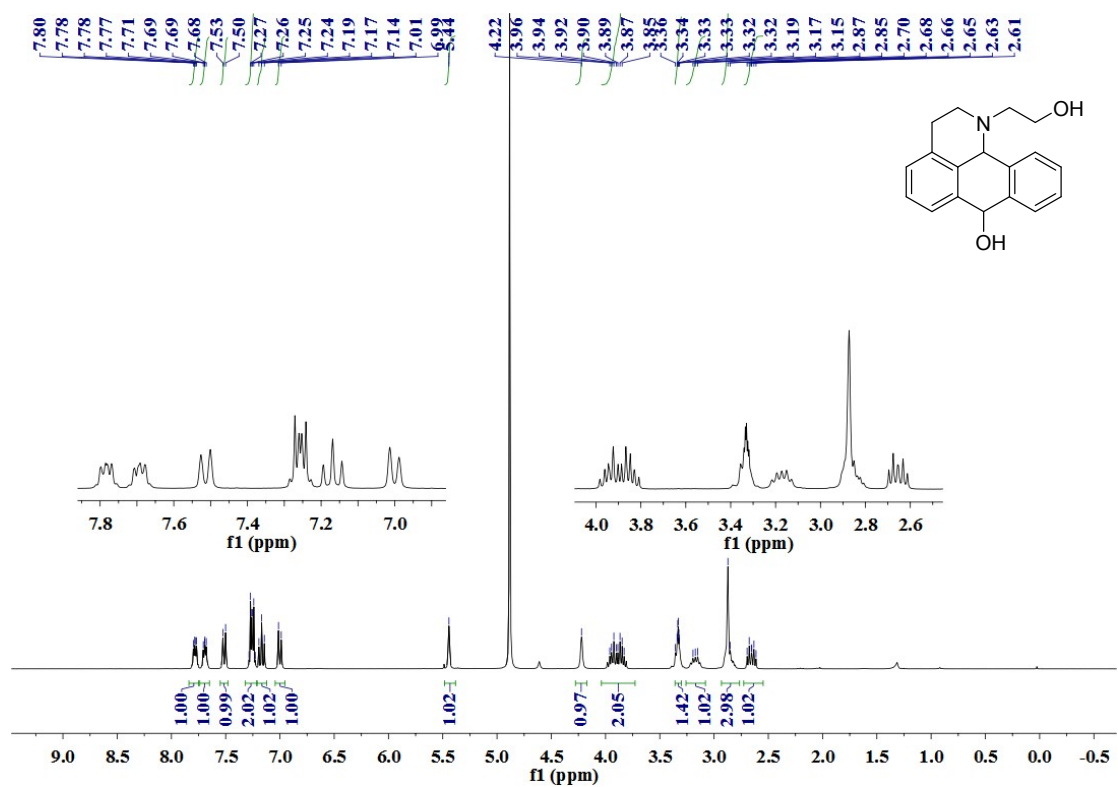

$^{13}\text{C}$  NMR spectrum of **3**

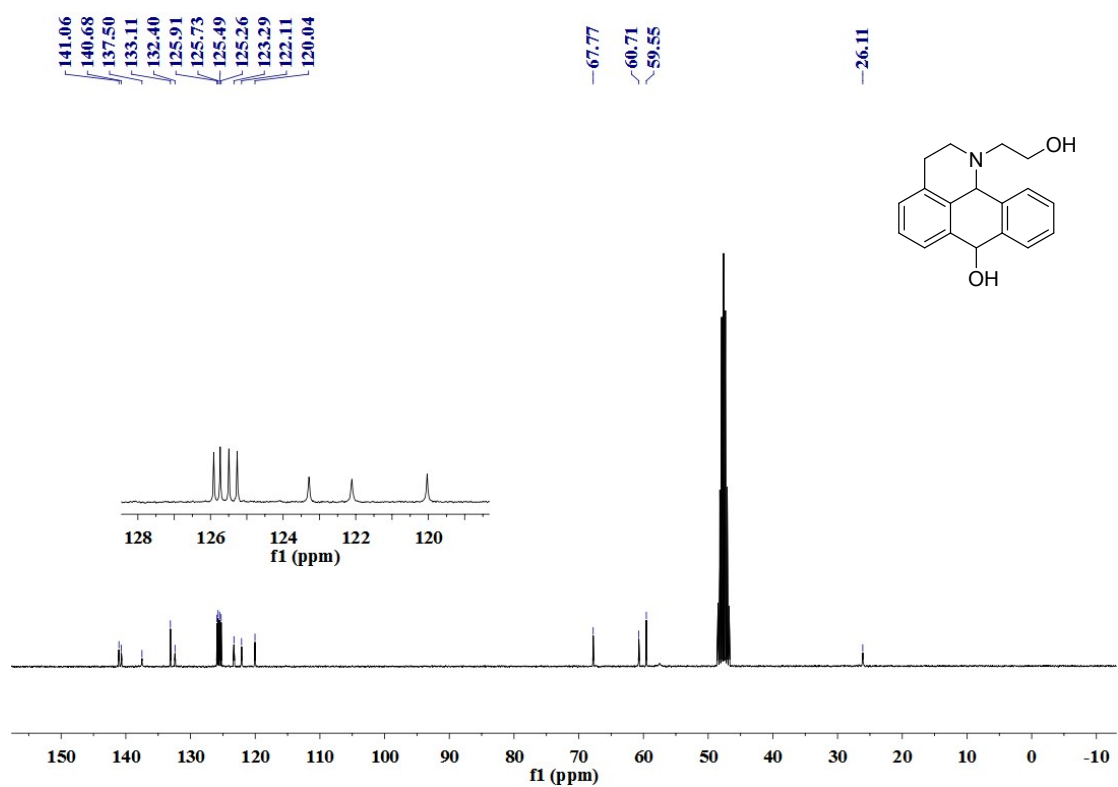

$^1\text{H}$  NMR spectrum of **4**

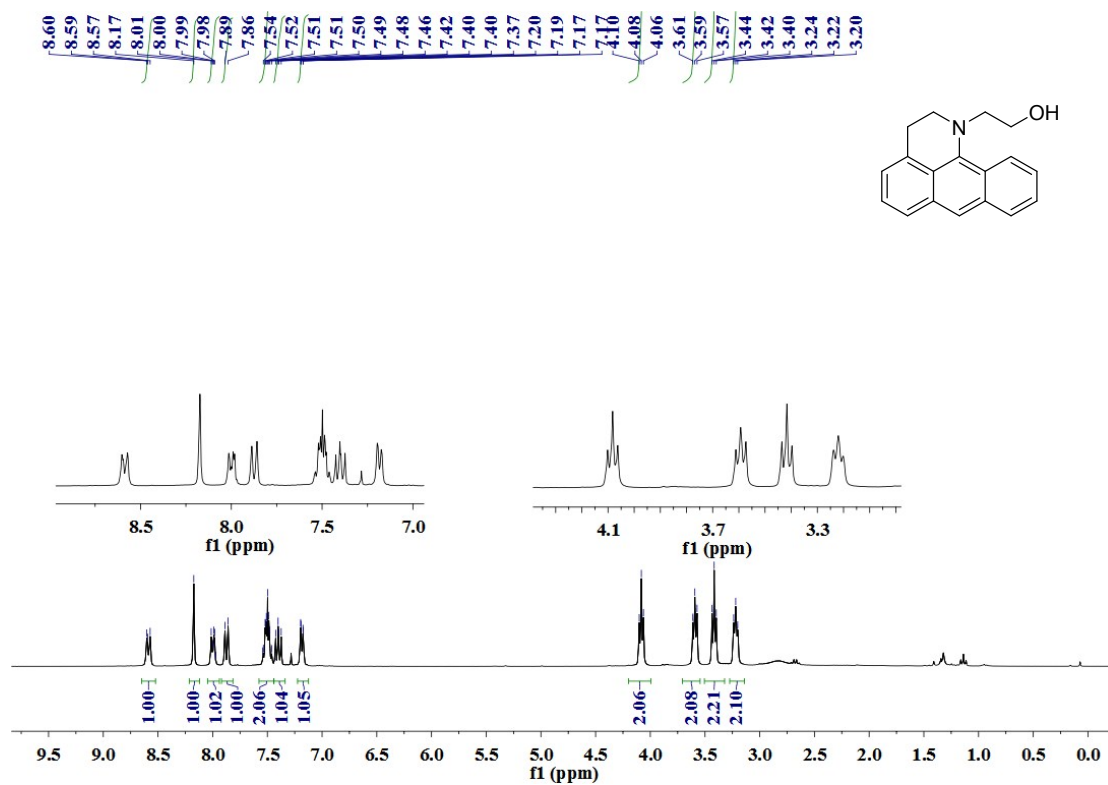

$^{13}\text{C}$  NMR spectrum of **4**

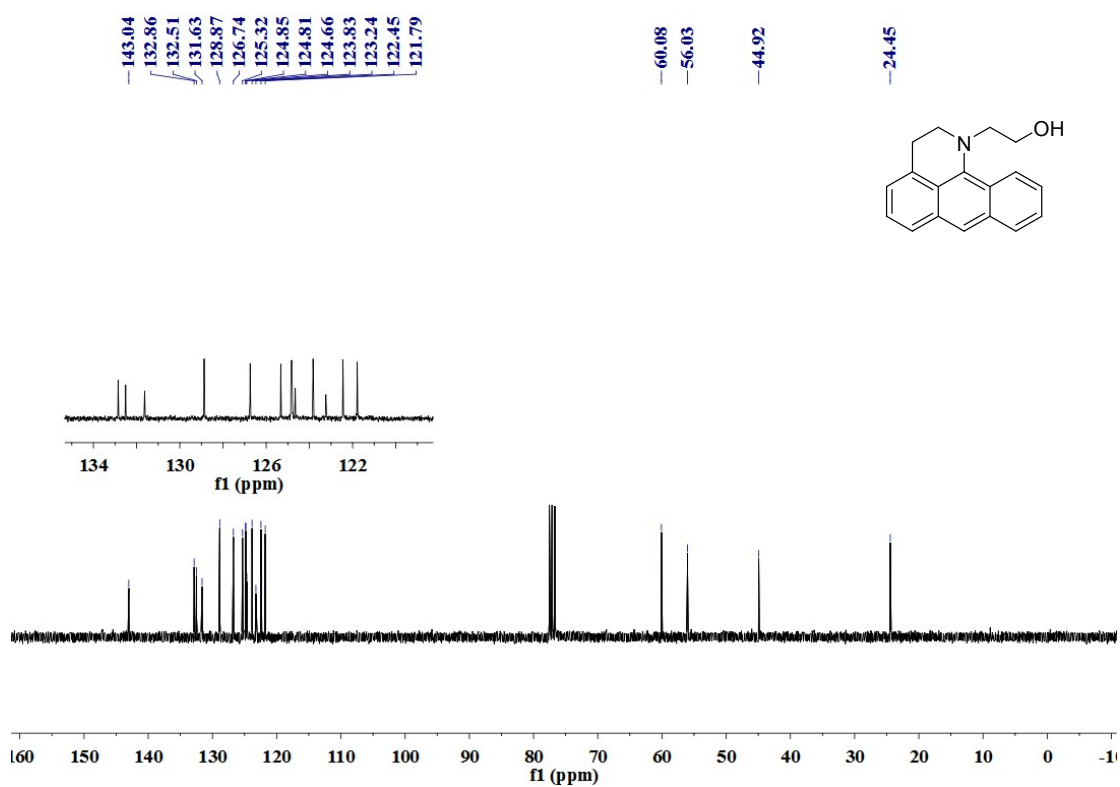

$^1\text{H}$  NMR spectrum of **J-A**

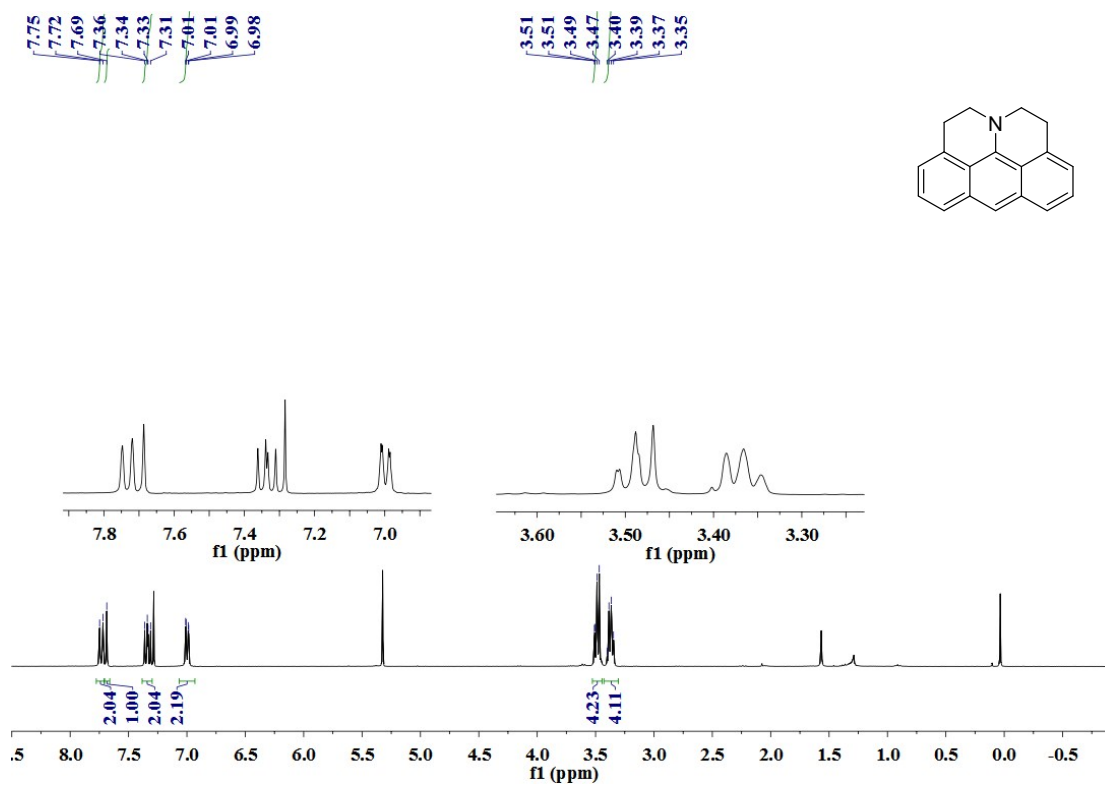

$^{13}\text{C}$  NMR spectrum of **J-A**

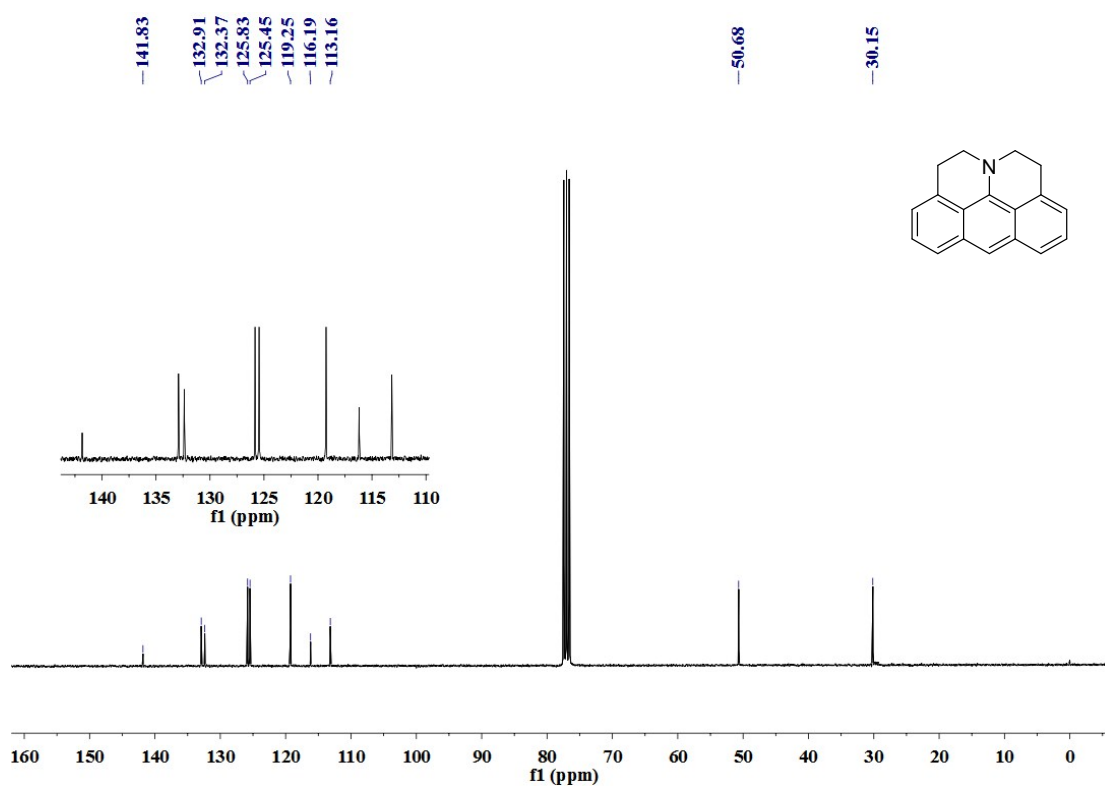

$^1\text{H}$  NMR spectrum of **5**

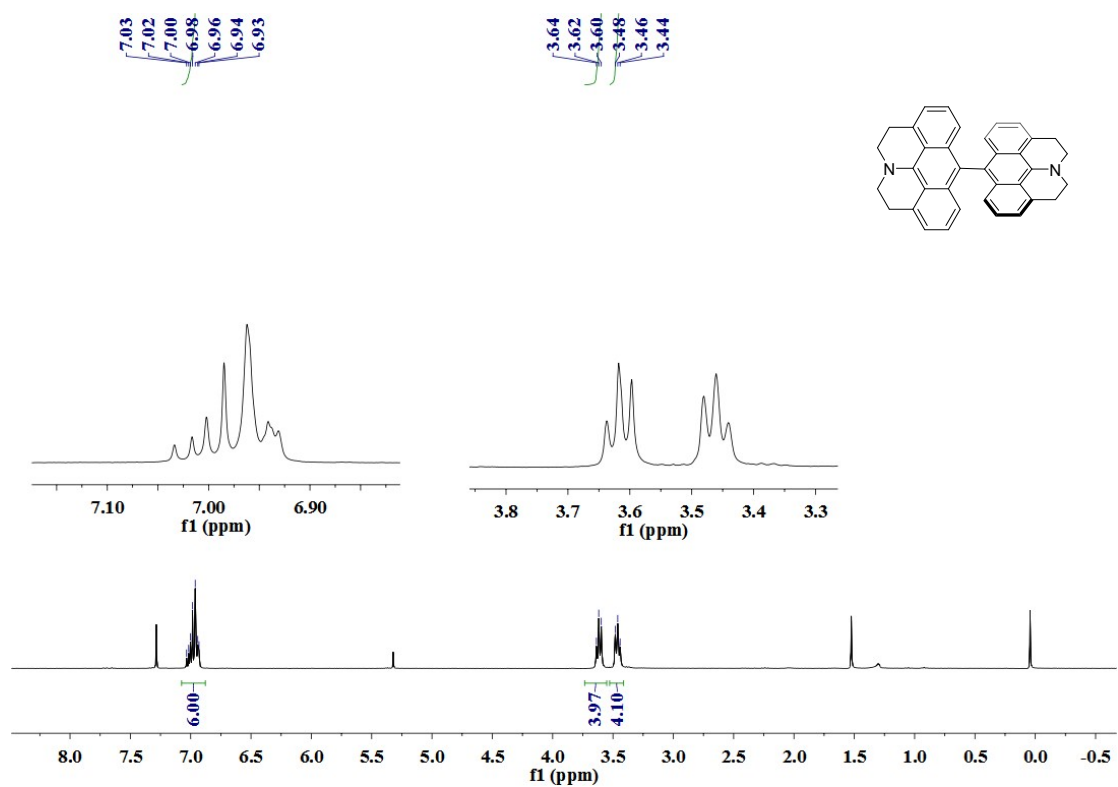

$^{13}\text{C}$  NMR spectrum of **5**

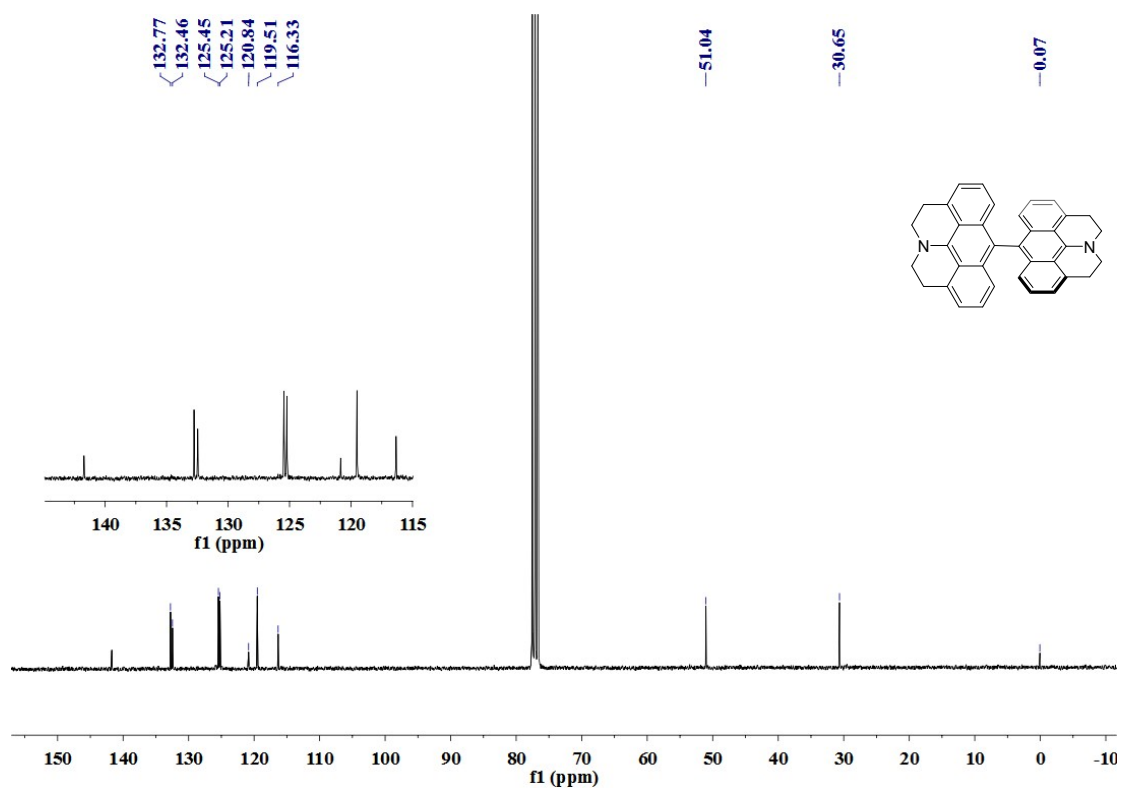

## Reference

- (1) (a) V. Castro-Castillo, C. Suarez-Rozas, A. Pabon, E. G. Perez, B. K. Cassels and S. Blair, *Bioorg. Med. Chem. Lett.*, 2013, **23**, 327-329. (b) Bremner, J. B.; Jaturonrusmee, W.; Engelhardt, L. M.; White, A. H. *Tetrahedron Lett.* 1989, **30**, 3213.
- (2) Galanin M. D.; Kutenkov A. A.; Smorchkov V. N.; Timofeev Y. P.; Chizhikov Z. A. *Opt. Spektrosk.*, 1982, **53**, 683.
- (3) Both the geometry optimization and energy calculation were performed by employing density functional theory (DFT), at the level of B3LYP/6-31G(d) on the Gaussian09 program package, M. J. Frisch, G. W. Trucks, H. B. Schlegel, G. E. Scuseria, M. A. Robb, J. R. Cheeseman, G. Scalmani, V. Barone, B. Mennucci, G. A. Petersson, H. Nakatsuji, M. Caricato, X. Li, H. P. Hratchian, A. F. Izmaylov, J. Bloino, G. Zheng, J. L. Sonnenberg, M. Hada, M. Ehara, K. Toyota, R. Fukuda, J. Hasegawa, M. Ishida, T. Nakajima, Y. Honda, O. Kitao, H. Nakai, T. Vreven, J. A. Montgomery, Jr., J. E. Peralta, F. Ogliaro, M. Bearpark, J. J. Heyd, E. Brothers, K. N. Kudin, V. N. Staroverov, R. Kobayashi, J. Normand, K. Raghavachari, A. Rendell, J. C. Burant, S. S. Iyengar, J. Tomasi, M. Cossi, N. Rega, J. M. Millam, M. Klene, J. E. Knox, J. B. Cross, V. Bakken, C. Adamo, J. Jaramillo, R. Gomperts, R. E. Stratmann, O. Yazyev, A. J. Austin, R. Cammi, C. Pomelli, J. W. Ochterski, R. L. Martin, K. Morokuma, V. G. Zakrzewski, G. A. Voth, P. Salvador, J. J. Dannenberg, S. Dapprich, A. D. Daniels, O. Farkas, J. B. Foresman, J. V. Ortiz, J. Cioslowski and D. J. Fox, *Gaussian 09, Revision A.02*, Gaussian, Inc., Wallingford, CT, 2009
